# Supplementary material
Source: Springer Nature journal article supplement (https://www.springermedizin.de/resource/supplementary/12936_2011_1716_MOESM2_ESM.pdf/9541556)
Supplement: MOESM2 [file 9541556]

Total Recruitment  
1,719

Cambodia  
828

Myanmar  
891

Site1 (37%)  
303

Site2 (36%)  
300

Site3 (27%)  
225

Site4 (51%)  
450

Site5 (49%)  
441

Seed 1 (32%)  
97 ( 10 waves)

Seed 1 (17%)  
50 ( 7 waves)

Seed 1 (17%)  
38 ( 7 waves)

Seed 1 (26%)  
116 ( 6 waves)

Seed 1 (15%)  
64 ( 8 waves)

Seed 2 (15%)  
45 ( 8 waves)

Seed 2 (15%)  
46 ( 7 waves)

Seed 2 (17%)  
39 ( 4 waves)

Seed 2 (44%)  
200 ( 8 waves)

Seed 2 (20%)  
89 ( 5 waves)

Seed 3 (24%)  
72 ( 7 waves)

Seed 3 (28%)  
84 ( 7 waves)

Seed 3 (3%)  
7 ( 2 waves)

Seed 3 (10%)  
44 ( 5 waves)

Seed 3 (21%)  
94 ( 8 waves)

Seed 4 (16%)  
48 ( 7 waves)

Seed 4 (13%)  
38 ( 7 waves)

Seed 4 (7%)  
16 ( 3 waves)

Seed 4 (4%)  
16 ( 3 waves)

Seed 4 (8%)  
37 ( 10 waves)

Seed 5 (5%)  
15 ( 7 waves)

Seed 5 (13%)  
39 ( 7 waves)

Seed 5 (36%)  
80 ( 7 waves)

Seed 5 (7%)  
33 ( 4 waves)

Seed 5 (18%)  
81 ( 8 waves)

Seed 6 (9%)  
26 ( 7 waves)

Seed 6 (14%)  
43 ( 7 waves)

Seed 6 (20%)  
45 ( 4 waves)

Seed 6 (9%)  
41 ( 6 waves)

Seed 6 (17%)  
76 ( 6 waves)
